# Supplementary material
Source: Springer Nature journal article supplement (https://www.springermedizin.de/resource/supplementary/12963_2011_169_MOESM7_ESM.pdf/9572804)

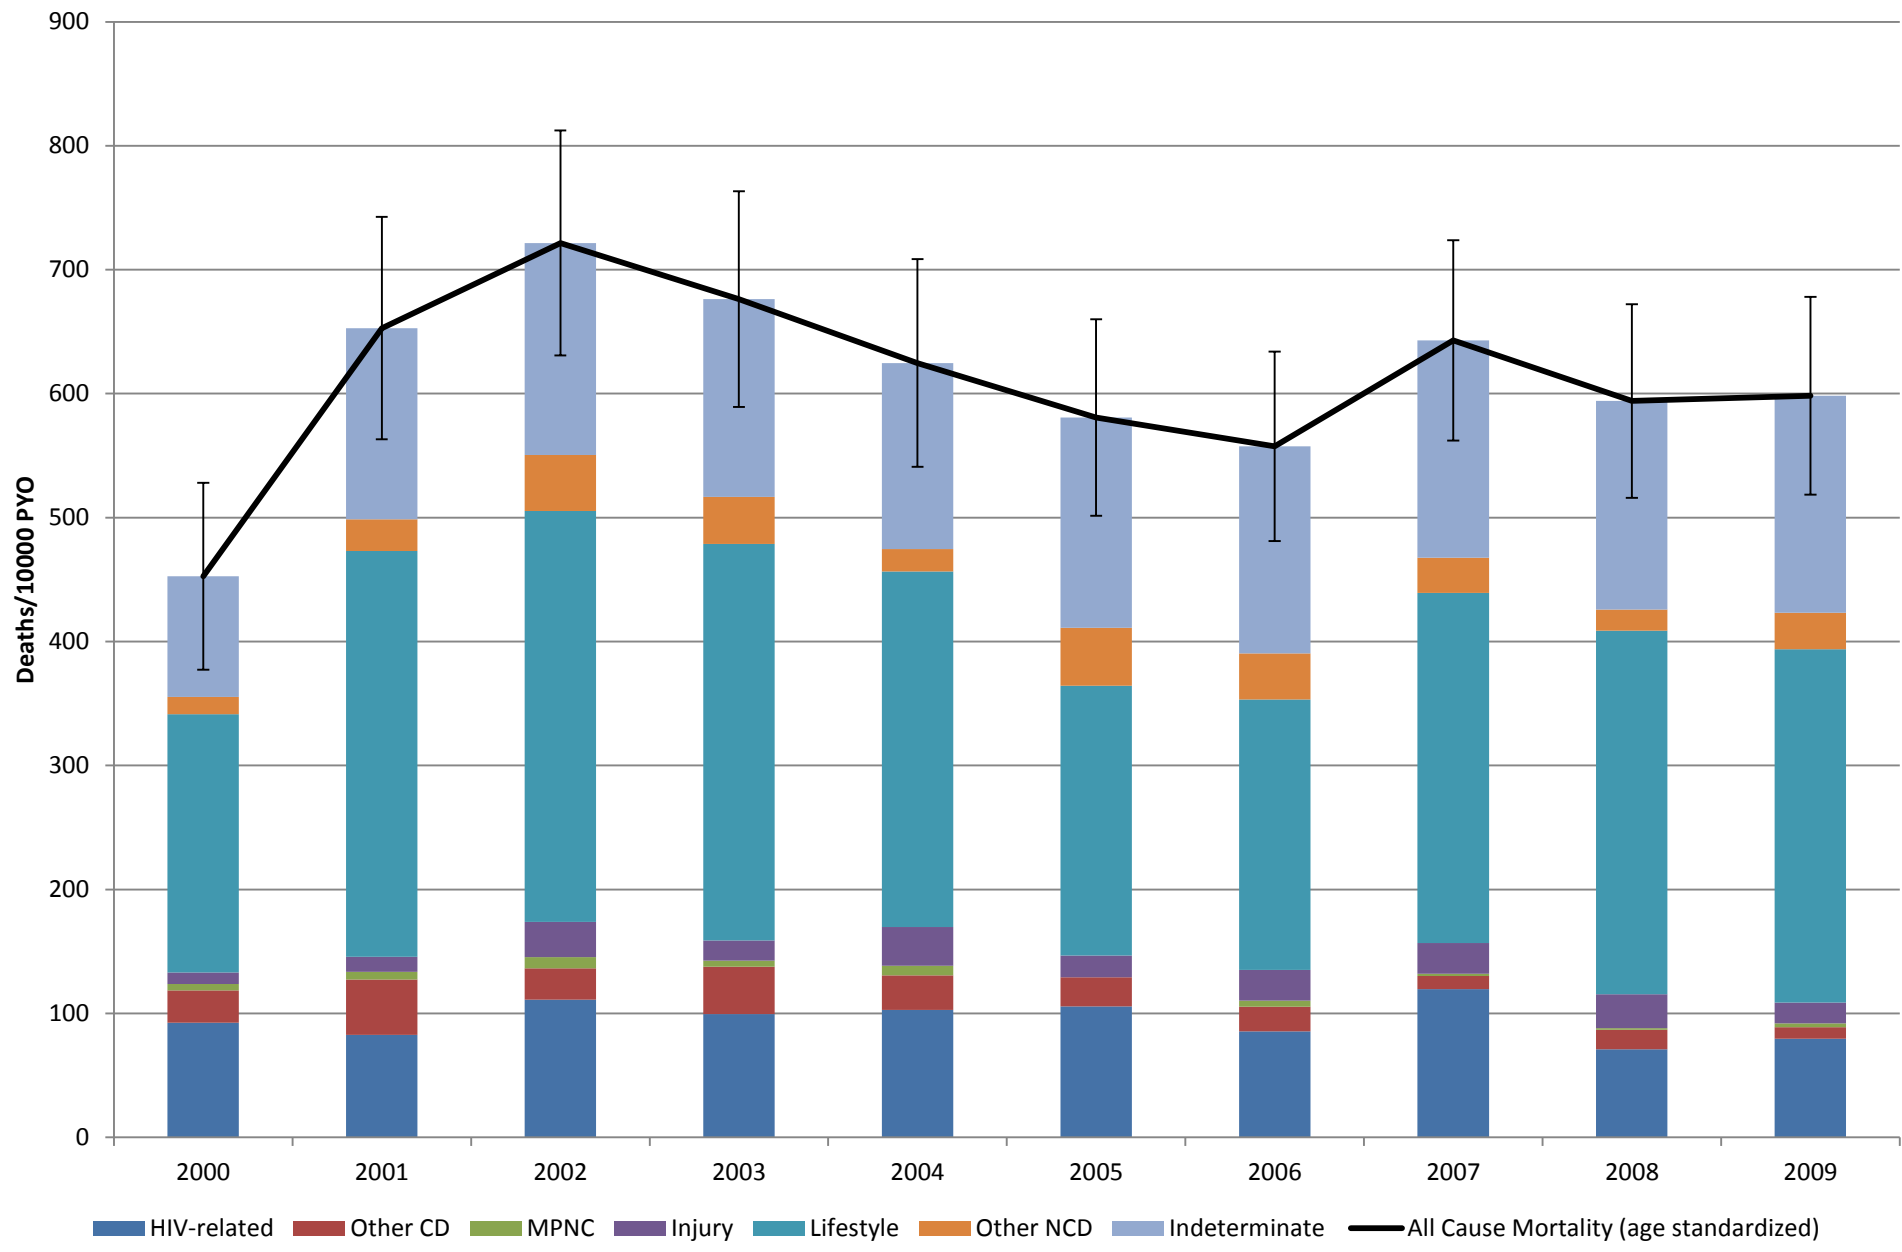

Supplement: MOESM7 [file 9572804]
